# Supplementary material for: Common soluble carbohydrates affect the growth, survival, and fatty acid profile of black soldier fly larvae Hermetia illucens (Stratiomyidae)
Source: PubMed Central journal article supplement — Sci Rep. 2024 Nov 15;14:28157. doi: 10.1038/s41598-024-75730-5 (PMC11568187; doi:10.1038/s41598-024-75730-5), 2024-11-15

**Supplementary data 1: Table S1: Comparison of larval fatty acid composition for *H. illucens* fed with different mono- and di-saccharides (n=4).**

|                      | <b>BSF-CEL</b>  | <b>BSF-FRU</b>   | <b>BSF-GAL</b>  | <b>BSF-GLU</b>  | <b>BSF-LAC</b>  | <b>BSF-MAL</b> | <b>BSF-SUC</b>  | <b>FEED</b>  | <b>Statistical analyses</b>            |
|----------------------|-----------------|------------------|-----------------|-----------------|-----------------|----------------|-----------------|--------------|----------------------------------------|
| C10:0                | 1,27 ± 0.16 a   | 1.01 ± 0.09 ab   | 0.98 ± 0.13 ab  | 0.96 ± 0.13 bc  | 0.77 ± 0.13 b   | 1.24 ± 0.14 ac | 0.97 ± 0.10 ab  | 0.00 ± 0.00  | F <sub>6,21</sub> =7.336, p<0.001      |
| C12:0                | 43,10 ± 5.01 a  | 48.90 ± 1.97 ab  | 47.46 ± 4.23 ac | 48.38 ± 2.17 ab | 43.35 ± 1.31 a  | 54.59 ± 2.17 b | 50.74 ± 1.57 bc | 0.75 ± 0.00  | F <sub>6,21</sub> =7.556, p<0.001      |
| C14:0                | 5,86 ± 0.44 a   | 7.12 ± 0.20 b    | 6.38 ± 0.08 ac  | 7.12 ± 0.16 b   | 6.53 ± 0.25 c   | 6.85 ± 0.19 bc | 7.21 ± 0.26 b   | 0.19 ± 0.04  | F <sub>6,21</sub> =15.760, p<0.001     |
| C14:1                | 0,09 ± 0.02 a   | 0.23 ± 0.02 ab   | 0.19 ± 0.03 ab  | 0.21 ± 0.02 ab  | 0.21 ± 0.02 ab  | 0.26 ± 0.03 b  | 0.26 ± 0.03 b   | 0.00 ± 0.00  | χ <sup>2</sup> =20.587, d.f.6, p<0.001 |
| C16:0                | 12,36 ± 1.05 ab | 11.67 ± 0.09 ab  | 11.89 ± 1.14 ab | 11.83 ± 0.38 ab | 12.85 ± 0.27 a  | 10.46 ± 0.77 b | 11.42 ± 0.27 ab | 15.69 ± 0.05 | χ <sup>2</sup> =15.213, d.f.6, p<0.050 |
| C16:1                | 2,61 ± 0.04 a   | 1.96 ± 0.13 b    | 2.12 ± 0.23 b   | 1.90 ± 0.16 b   | 2.64 ± 0.20 a   | 2.10 ± 0.20 b  | 2.13 ± 0.13 b   | 0.00 ± 0.00  | F <sub>6,21</sub> =12.320, p<0,001     |
| C17:0                | 0,16 ± 0.03     | 0.06 ± 0.03      | 0.00 ± 0.00     | 0.06 ± 0.01     | 0.00 ± 0.00     | 0.00 ± 0.00    | 0.00 ± 0.00     | 0.00 ± 0.00  | /                                      |
| C17:1                | 0,16 ± 0.01     | 0.00 ± 0.00      | 0.00 ± 0.00     | 0.00 ± 0.00     | 0.00 ± 0.00     | 0.00 ± 0.00    | 0.00 ± 0.00     | 0.00 ± 0.00  | /                                      |
| C18:0                | 2,38 ± 0.28 a   | 1.67 ± 0.16 ab   | 1.60 ± 0.24 ab  | 1.73 ± 0.15 ab  | 1.66 ± 0.11 ab  | 1.37 ± 0.06 b  | 1.54 ± 0.30 ab  | 2.30 ± 0.9   | χ <sup>2</sup> =15.802, d.f.6, p=0.001 |
| C18:1n9<br>cis+trans | 12,40 ± 1.31 ab | 10.85 ± 0.66 ac  | 11.17 ± 1.30 bc | 10.98 ± 0.67 bc | 12.86 ± 0.52 b  | 9.52 ± 0.50 c  | 10.52 ± 0.50 ac | 23.22 ± 0.02 | F <sub>6,21</sub> =7.021, p<0.001      |
| C18:2n6 cis          | 13,41 ± 2.48 ab | 15.09 ± 1.18 ab  | 16.38 ± 1.40 a  | 15.24 ± 0.80 ab | 17.22 ± 0.46 a  | 12.58 ± 0.67 b | 14.09 ± 0.41 ab | 54.81 ± 0.06 | χ <sup>2</sup> =19.227, d.f.6, p<0.001 |
| C18:3n3              | 0,72 ± 0.18 ab  | 0.61 ± 0.04 ab   | 0.82 ± 0.05 ac  | 0.62 ± 0.01 ab  | 0.87 ± 0.02 a   | 0.49 ± 0.04 b  | 0.57 ± 0.04 bc  | 2,51 ± 0.04  | χ <sup>2</sup> =20.054, d.f.6, p<0.001 |
| UND9                 | 2,46 ± 0.52 a   | 0.14 ± 0.02 ab   | 0.07 ± 0.08 b   | 0.20 ± 0.04 a   | 0.19 ± 0.03 b   | 0.00 ± 0.00 b  | 0.12 ± 0.04 b   | 0.00 ± 0.00  | χ <sup>2</sup> =22.726, d.f.6, p<0.001 |
| C20:0                | 0.00 ± 0.00     | 0.00 ± 0.00      | 0.00 ± 0.00     | 0.00 ± 0.00     | 0.00 ± 0.00     | 0.00 ± 0.00    | 0.00 ± 0.00     | 0.34 ± 0.00  | /                                      |
| C20:1n9              | 0.00 ± 0.00     | 0.00 ± 0.00      | 0.00 ± 0.00     | 0.00 ± 0.00     | 0.00 ± 0.00     | 0.00 ± 0.00    | 0.00 ± 0.00     | 0.20 ± 0.01  | /                                      |
| SFA                  | 64,96 ± 4,27 a  | 70,37 ± 1,97 bcd | 68,31 ± 3,02 ad | 70,04 ± 1,64 ac | 65,17 ± 1,28 ab | 74,52 ± 1,41 c | 71,88 ± 1,04 cd | 19.27 ± 0.05 | F <sub>6,21</sub> =8.742, p<0,001      |
| MUFA                 | 15,11 ± 1,29 ab | 13,04 ± 0,79 bc  | 13,48 ± 1,51 ac | 13,10 ± 0,83 bc | 15,71 ± 0,73 a  | 11,89 ± 0,72 c | 12,91 ± 0,63 bc | 23.42 ± 0.00 | F <sub>6,21</sub> =7.472, p<0,001      |
| PUFA                 | 14,13 ± 2,66 ab | 15,70 ± 1,23 ab  | 17,20 ± 1,38 a  | 15,86 ± 0,81 ab | 18,09 ± 0,48 a  | 13,07 ± 0,72 b | 14,66 ± 0,45 ab | 57.32 ± 0.10 | χ <sup>2</sup> =16.605, d.f.6, p<0.001 |
| Identified<br>FAME's | 94,20 ± 0,53 a  | 99,10 ± 0,05 ab  | 98,98 ± 0,13 ab | 98,99 ± 0,05 ab | 98,96 ± 0,10 ab | 99,47 ± 0,07 b | 99,44 ± 0,07 b  | 100.0(± 0.00 | χ <sup>2</sup> =29.539, d.f.6, p<0.001 |

Means ±SD within a column followed by different letters are significantly different (p<0.05). χ<sup>2</sup> are presented for Kruskal-Wallis test. F value are presented for ANOVA test.

BSF Black Soldier Fly, CEL Cellulose, FRU Fructose, GAL Galactose, GLU Glucose, LAC Lactose, MAL Maltose, SUC Sucrose. FEED correspond to the initial fatty acid composition of the diet.



Supplementary data 2: Tab. S2: Initial individual weight of *Hermetia illucens* larvae harvested 5 days post-hatch for feeding experiment:

| Carbohydrates           | Mean individual weight<br>at day 0 ± SD (mg) |   |
|-------------------------|----------------------------------------------|---|
| CELLULOSE               | 7.128 ± 0.49                                 | a |
| FRUCTOSE                | 7.118 ± 0.15                                 | a |
| GALACTOSE               | 7.280 ± 0.49                                 | a |
| GLUCOSE                 | 7.000 ± 0.38                                 | a |
| LACTOSE                 | 7.063 ± 0.45                                 | a |
| MALTOSE                 | 7.065 ± 0.21                                 | a |
| SUCROSE                 | 7.223 ± 0.44                                 | a |
| Statistical<br>analyses | F <sub>6,21</sub> = 0.181, p>0.05            |   |

*Means with different letters significantly differ.*

Supplementary data 3 : Tab. S3 : Instrumental details of GCxGC-FID method used for fatty acid identification

| <b>GCxGC-FID PARAMETERS</b>           |                                                                                 |                              |
|---------------------------------------|---------------------------------------------------------------------------------|------------------------------|
| <b>Carrier gas</b>                    | Helium                                                                          |                              |
| <b><sup>1</sup>D flow-rate</b>        | 0.5 mL/min                                                                      |                              |
| <b><sup>2</sup>D flow-rate</b>        | 20 mL/min                                                                       |                              |
| <b>Modulation period</b>              | 4 s                                                                             |                              |
| <b>Reinjection time</b>               | 100 ms                                                                          |                              |
| <b>Oven Temperature program</b>       | 2 min at 40°C; from 40 to 250°C at 11°C/min and hold it for 2 min               |                              |
| <b>Injection mode</b>                 | Split mode (1:20)                                                               |                              |
| <b>Injection volume</b>               | 1.0 µL                                                                          |                              |
| <b>Injector Temperature</b>           | 250 °C                                                                          |                              |
| <b>FID Temperature</b>                | 250 °C                                                                          |                              |
| <b>FID data acquisition frequency</b> | 100 Hz                                                                          |                              |
| <b>FID parameters</b>                 | airflow: 300 mL/min, H2: 30 mL/min; make-up gas: 10 mL/min                      |                              |
| <b>Instrumentation</b>                |                                                                                 |                              |
| <b>Autosampler</b>                    | AOC-30i Autoinjector                                                            | Shimadzu                     |
| <b>GC</b>                             | Nexi GC-2030                                                                    | Shimadzu                     |
| <b>Detector</b>                       | FID                                                                             | Shimadzu                     |
| <b><sup>1</sup>D column</b>           | <sup>1</sup> D-FAMES 20m x 0.18 mm x 0.1 µm polar fused silica capillary column | SepSolve                     |
| <b><sup>2</sup>D column</b>           | 2D-FAMES 5m x 0.25 mm x 0.1 µm non-polar fused silica capillary column          | SepSolve                     |
| <b>Bleedline</b>                      |                                                                                 | SepSolve                     |
| <b>Modulator</b>                      | Revered fill/flush INSIGHT flow modulator                                       | SepSolve                     |
| <b>Software</b>                       |                                                                                 |                              |
| <b>Data acquisition</b>               | LabSolution Version 5.111                                                       | Shimadzu                     |
| <b>Data Processing</b>                | ChromSpace Version 1.5.1                                                        | Markes International Limited |

Method adapted from :

[19] Ferrara, D.; Cescon, M.; Giacoppo, G.; Costa, V.; Purcaro, G.; Spadafora, N.D.; Cordero, C.; Pasti, L.; Cavazzini, A.; Beccaria, M. Composition and Nutritional Values of Fatty Acids in Marine Organisms by One-Step Microwave-Assisted Extraction/Derivatization and Comprehensive Two-Dimensional Gas Chromatography -Flame Ionization Detector. *Journal of Chromatography B* **2024**, 1236, 124074, doi:10.1016/j.jchromb.2024.124074.

Supplementary data 4 :

Fig. S4 : PCA circle correlation for fatty acid profiles of *Hermetia illucens* larvae fed with different carbohydrates:

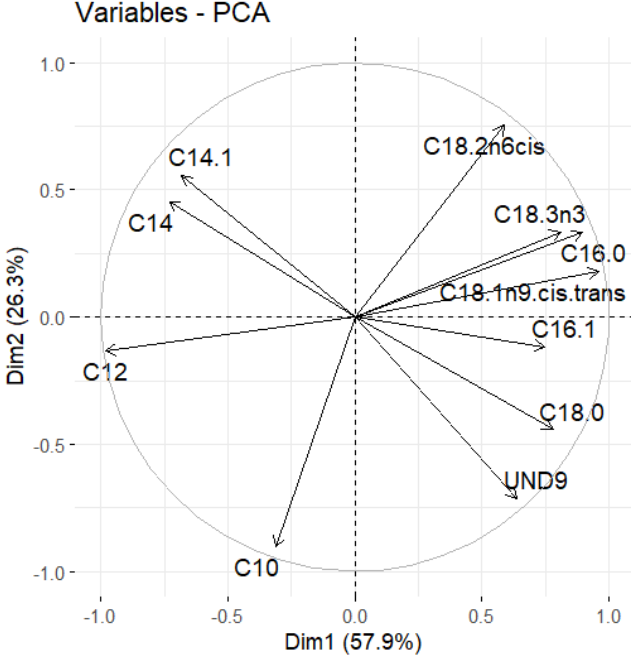

Supplementary data 5 :

Fig. S5: Comprehensive two-dimensional GC (GC×GC-FID) chromatogram for fatty acid profiles of *Hermetia illucens* larvae fed with chicken feed and cellulose diet. The unidentified compound 9 is indicated by an arrow:

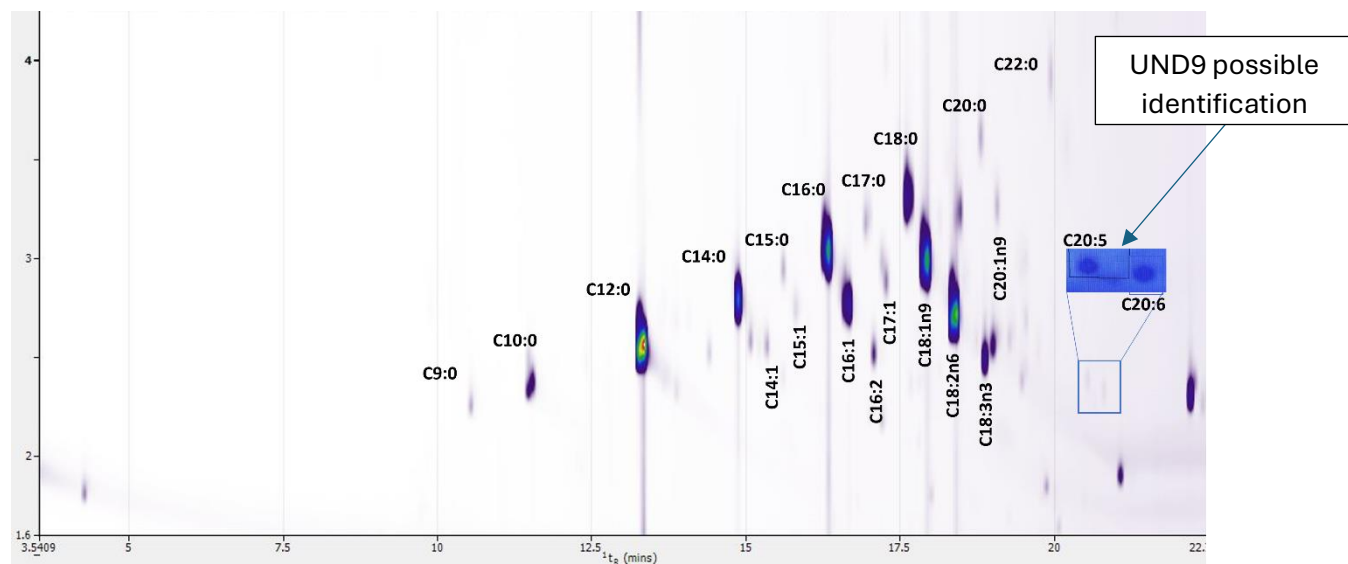

Supplement: 41598_2024_75730_MOESM1_ESM.pdf [file 41598_2024_75730_MOESM1_ESM.pdf]
